# Supplementary material for: Viewpoint Robustness of Automated Facial Action Unit Detection Systems
Source: MDPI journal article supplement (doi:10.3390/app112311171), 2021-11-25
Supplement: s1 [file s1]

Archive with 1 entries (1 files):
- applsci-1438355-supplementary.pdf
